# Supplementary material for: In Silico Analysis of the Structural and Biochemical Features of the NMD Factor UPF1 in Ustilago maydis
Source: PLoS One. 2016 Feb 10;11(2):e0148191. doi: 10.1371/journal.pone.0148191 (PMC4749658; doi:10.1371/journal.pone.0148191)
Supplement: S1 Table — Different crystallographic studies have been performed using different portions of UPF1 from H. sapiens and S. cerevisiae. The ID for each crystal and their general characteristics are presented. Some of the structures were used as templates along this work. (XLSX) [file pone.0148191.s001.xlsx]

## Sheet: Hoja1
S1 Table. UPF1 crystals
Description	PDB ID	Resolution	Residues (aa)	Organism	Reference
Upf1 Helicase	2XZP	2.72 Å	623	Human	[30]
Crystal Structure Of The Complex Between Human Nonsense Mediated Decay Factors Upf1 And Upf2	2WJV	2.85 Å	1794	Human	[29]
Crystal Structure Of The Complex Between Human Nonsense Mediated Decay Factors Upf1 And Upf2. Orthorhombic Form	2WJY	2.50 Å	800	Human	[29]
Structural And Functional Insights Into The Human Upf1 Helicase Core	2GJK	2.60 Å	624	Human	[19]
Structural And Functional Insights Into The Human Upf1 Helicase Core	2GK6	2.40 Å	1248	Human	[19]
Structural And Functional Insights Into The Human Upf1 Helicase Core	2GK7	2.80 Å	624	Human	[19]
Crystal Structure Of The Upf2-Interacting Domain Of Nonsense Mediated mRNA Decay Factor Upf1	2IYK	2.95 Å	324	Human	[28]
Upf1-RNA Complex	2XZL	2.40 Å	811	Synthetic Saccharomyces cerevisiae	[30]
Upf1 Helicase - RNA Complex	2XZO	2.39 Å	630	Synthetic Human	[30]
